# Supplementary material
Source: PubMed Central journal article supplement (PMC2963167)
Supplement: NIHMS231058-supplement-1_si_001.pdf [file NIHMS231058-supplement-1_si_001.pdf]

## Supplemental Material

Single Stranded DNA oligonucleotides for construction of IAPP gene:

### Wild Type IAPP Forward primer (IAPP-FOR) with NcoI restriction site.

5'– GTGGCTGAGACCATGGGC AAA TGC AAC ACC GCG ACC TGC GCC ACC CAG CGT CTG GCG AAC TTT CTG  
GTG CAT AGC AGC AAC AAC

### Wild Type IAPP Reverse primer (IAPP-Rev) with BamH I restriction site.

5'– GACGCACCGGATCC ATA GGT GTT GCT GCC CAC GTT GGT GCT GCT CAG AAT CGC GCC AAA GTT GTT  
GCT GCT ATG CAC CAG

### Primers for PCR amplification of full-length IAPP gene:

Forward: 5'–GTGGCTGAGACCATGGGC AAA

Reverse: 5'–GACGCACCGGATCC ATA GGT GTT

### Primers for Random Mutagenesis:

Forward Primer: 5'– CTTTAATAAGGAGATATACCATGGGC -3'

Reverse Primer: 5'–GCG GAG CCA GCG GAT CC -3'

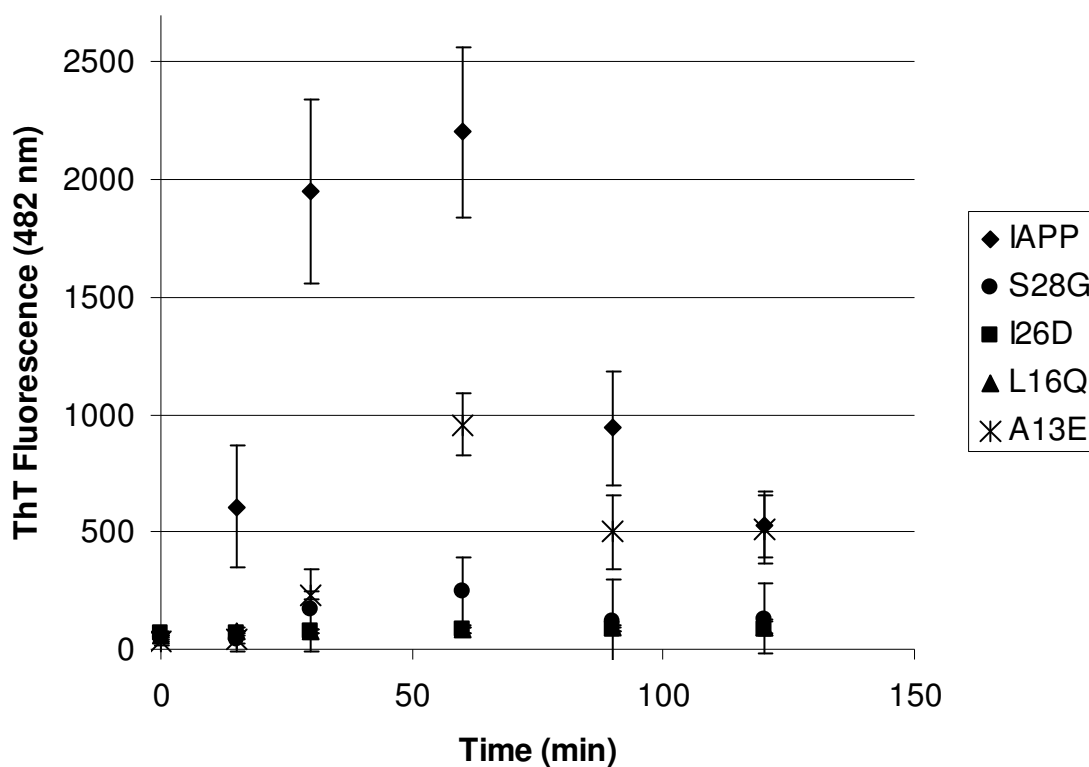

**Figure 1S:** Comparison of thioflavin T binding time course by selected variants and wild-type human IAPP. One representative time experiment is shown with the error bars representing the standard deviation of all trials ( $n \geq 4$ ). Each aliquot of disaggregated IAPP was thawed and the HFIP removed over a stream of dry nitrogen gas. The resulting solid was dissolved in 20 mM tris buffer pH 7.40 to 106  $\mu$ M. The samples were incubated at 37°C with shaking (200 rpm). 17  $\mu$ L of each sample was removed at indicated time points and mixed with 663  $\mu$ L of 12.0  $\mu$ M thioflavin T in 20 mM Tris buffer pH 7.40. The thioflavin T mixture was incubated at room temperature in the dark for 5 minutes before recording the thioflavin T fluorescence spectrum ( $Ex_{450nm}$ ) using a Hitachi F-7000 fluorescence spectrophotometer.
